# Supplementary material
Source: Elsevier journal article supplement (https://univ-rennes.hal.science/hal-01532174v1/file/mmc7.zip)
Supplement: mmc7 [file mmc7.zip]

Archive with 2 entries (2 files):
- Complex_NiCl2(py)4.cif
- CHECKCIF-complex_NiCl2(py)4.pdf
