# Supplementary material
Source: Elsevier journal article supplement (https://univ-rennes.hal.science/hal-01532174v1/file/mmc7.zip)
Supplement: mmc7 [file mmc7.zip › Complex_NiCl2(py)4.cif]

#
#
#----------------------------------------------------------------------------#
#           CIF file created and formatted by CRYSCALC (February 2016)       #
#----------------------------------------------------------------------------#
# Input CIF files:                                                           #
#  1. JC011x2.cif                                                                #
#  2. import.cif                                                             #
# Date of diffraction experiment : 24mar16                                   #
#----------------------------------------------------------------------------#
#

data_JC011X2


#----------------------------------------------------------------------------#
#                              CHEMICAL_INFORMATION                          #
#----------------------------------------------------------------------------#
 

_chemical_name_systematic
;
 ?
;
_chemical_formula_moiety              'C20 H20 Cl2 N4 Ni, 0.366(H2 O)'
_chemical_formula_sum                 'C20 H20.73 Cl2 N4 Ni O0.37'
_chemical_formula_weight               452.61
_chemical_compound_source             'synthesis as described'

#----------------------------------------------------------------------------#
#                             UNIT CELL INFORMATION                          #
#----------------------------------------------------------------------------#
 

_space_group_crystal_system              Tetragonal
_space_group_name_H-M_alt                'I 41/a c d'
_space_group_name_Hall                   '-I 4bd 2c'
_space_group_IT_number                   142
loop_
  _space_group_symop_operation_xyz
 'x, y, z'
 '-x+1/2, -y, z+1/2'
 '-y+1/4, x+3/4, z+1/4'
 'y+1/4, -x+1/4, z+3/4'
 '-x+1/2, y, -z'
 'x, -y, -z+1/2'
 'y+1/4, x+3/4, -z+3/4'
 '-y+1/4, -x+1/4, -z+1/4'
 'x+1/2, y+1/2, z+1/2'
 '-x+1, -y+1/2, z+1'
 '-y+3/4, x+5/4, z+3/4'
 'y+3/4, -x+3/4, z+5/4'
 '-x+1, y+1/2, -z+1/2'
 'x+1/2, -y+1/2, -z+1'
 'y+3/4, x+5/4, -z+5/4'
 '-y+3/4, -x+3/4, -z+3/4'
 '-x, -y, -z'
 'x-1/2, y, -z-1/2'
 'y-1/4, -x-3/4, -z-1/4'
 '-y-1/4, x-1/4, -z-3/4'
 'x-1/2, -y, z'
 '-x, y, z-1/2'
 '-y-1/4, -x-3/4, z-3/4'
 'y-1/4, x-1/4, z-1/4'
 '-x+1/2, -y+1/2, -z+1/2'
 'x, y+1/2, -z'
 'y+1/4, -x-1/4, -z+1/4'
 '-y+1/4, x+1/4, -z-1/4'
 'x, -y+1/2, z+1/2'
 '-x+1/2, y+1/2, z'
 '-y+1/4, -x-1/4, z-1/4'
 'y+1/4, x+1/4, z+1/4'

_cell_length_a                         15.8029(18)
_cell_length_b                         15.8029
_cell_length_c                         16.875(2)
_cell_angle_alpha                      90
_cell_angle_beta                       90
_cell_angle_gamma                      90
_cell_volume                           4214.3(11)
_cell_formula_units_Z                 8
_cell_measurement_temperature         150(2)
_cell_measurement_reflns_used            9883
_cell_measurement_theta_min              3.03
_cell_measurement_theta_max             27.44
_cell_measurement_wavelength           0.71073

#----------------------------------------------------------------------------#
#                              CRYSTAL INFORMATION                           #
#----------------------------------------------------------------------------#
 
_exptl_crystal_description             stick
_exptl_crystal_colour                  yellow
_exptl_crystal_size_max                 0.600
_exptl_crystal_size_mid                 0.320
_exptl_crystal_size_min                 0.290
_exptl_crystal_density_meas           ?                               
_exptl_crystal_density_diffrn         1.427                           
_exptl_crystal_density_method         ?                               
_exptl_crystal_F_000                  1869                            
_exptl_special_details
;
 ?
;

#----------------------------------------------------------------------------#
#                             ABSORPTION CORRECTION                          #
#----------------------------------------------------------------------------#
 
_exptl_absorpt_coefficient_mu                         1.188
_exptl_absorpt_correction_type                       multi-scan
_exptl_absorpt_process_details
;
  [Sheldrick, G.M. (2014). SADABS Bruker AXS Inc., Madison, Wisconsin, USA]
;
_exptl_absorpt_correction_T_min                         0.494
_exptl_absorpt_correction_T_max                         0.709

#----------------------------------------------------------------------------#
#                                DATA COLLECTION                             #
#----------------------------------------------------------------------------#
 
_diffrn_measurement_device_type        'D8 VENTURE Bruker AXS'
_diffrn_measurement_method             'rotation images'
_diffrn_detector                       '(CMOS) PHOTON 100'
_diffrn_ambient_temperature             150(2)
_diffrn_radiation_wavelength            0.71073
_diffrn_radiation_type                  MoK\a
_diffrn_radiation_probe                 x-ray
_diffrn_radiation_source                'Incoatec microfocus sealed tube'
_diffrn_radiation_monochromator         'multilayer monochromator'
_diffrn_reflns_av_r_equivalents         0.0291
_diffrn_reflns_av_uneti/neti            0.0181
_diffrn_reflns_number                   16008
_diffrn_reflns_limit_h_min              -20
_diffrn_reflns_limit_h_max              20
_diffrn_reflns_limit_k_min              -20
_diffrn_reflns_limit_k_max              20
_diffrn_reflns_limit_l_min              -21
_diffrn_reflns_limit_l_max              18
_diffrn_reflns_theta_min                3.025
_diffrn_reflns_theta_max                27.460
_diffrn_reflns_theta_full               25.242
_diffrn_measured_fraction_theta_full    0.999
_diffrn_measured_fraction_theta_max     0.999
_reflns_number_total                    1212
_reflns_number_gt                       1099
_reflns_threshold_expression            >2sigma(I)

#----------------------------------------------------------------------------#
#                             COMPUTER PROGRAMS USED                         #
#----------------------------------------------------------------------------#
 
_computing_data_collection       'SAINT (Bruker, 2014)'
_computing_cell_refinement       'APEX3 (Bruker, 2015); SAINT (Bruker, 2014)'
_computing_data_reduction        'SAINT (Bruker, 2014)'
_computing_structure_solution    'SIR97 (Altomare et al., 1999)'
_computing_structure_refinement  'SHELXL-2014/7 (Sheldrick, 2014)'
_computing_molecular_graphics    'Ortep-3 for Windows (Farrugia, 1997)'
_computing_publication_material  'CRYSCALc (T. Roisnel, local program, 2015)'

#----------------------------------------------------------------------------#
#                             REFINEMENT INFORMATION                         #
#----------------------------------------------------------------------------#
 
_refine_special_details
;
Refinement of F^2^ against ALL reflections.  The weighted R-factor wR and
goodness of fit S are based on F^2^, conventional R-factors R are based
on F, with F set to zero for negative F^2^. The threshold expression of
F^2^ > 2sigma(F^2^) is used only for calculating R-factors(gt) etc. and is
not relevant to the choice of reflections for refinement.  R-factors based
on F^2^ are statistically about twice as large as those based on F, and R-
factors based on ALL data will be even larger.
;
_refine_ls_structure_factor_coef        Fsqd
_refine_ls_matrix_type                  full
_refine_ls_weighting_scheme             calc
_refine_ls_weighting_details            
        'w=1/[\s^2^(Fo^2^)+(0.0304P)^2^+5.0835P] where P=(Fo^2^+2Fc^2^)/3'
_atom_sites_solution_primary            ?
_atom_sites_solution_secondary          ?
_atom_sites_solution_hydrogens          mixed
_refine_ls_hydrogen_treatment           mixed
_refine_ls_extinction_method            none
_refine_ls_extinction_coef              .
_refine_ls_number_reflns                1212
_refine_ls_number_parameters            72
_refine_ls_number_restraints            0
_refine_ls_R_factor_all                 0.0286
_refine_ls_R_factor_gt                  0.0256
_refine_ls_wR_factor_ref                0.0686
_refine_ls_wR_factor_gt                 0.0653
_refine_ls_goodness_of_fit_ref          1.090
_refine_ls_restrained_S_all             1.090
_refine_ls_shift/su_max                 0.000
_refine_ls_shift/su_mean                0.000
_refine_diff_density_max                0.268
_refine_diff_density_min                -0.421
_refine_diff_density_rms                0.055

_iucr_refine_instructions_details
;
 .res SHELXL file: JC011x2.res
.................................................................

    JC011x2.res created by SHELXL-2014/7

TITL import_a.res in I4(1)/acd
CELL  0.71073  15.8029  15.8029  16.8752   90.000   90.000   90.000
ZERR     8.00   0.0018   0.0000   0.0020    0.000    0.000    0.000
LATT   2
SYMM  1/2 - X, - Y, 1/2 + Z
SYMM  1/4 - Y, 3/4 + X, 1/4 + Z
SYMM  1/4 + Y, 1/4 - X, 3/4 + Z
SYMM  1/2 - X,   Y, - Z
SYMM    X, - Y, 1/2 - Z
SYMM  1/4 + Y, 3/4 + X, 3/4 - Z
SYMM  1/4 - Y, 1/4 - X, 1/4 - Z
SFAC  C   H   CL  N   NI  O
UNIT   160.00 165.86  16.00  32.00   8.00   2.93
MERG   2
FMAP   2
PLAN   20
SIZE     0.29   0.32   0.60
ACTA
BOND   $H
CONF
LIST   4
WPDB  -2
L.S.   4
TEMP  -123.00
WGHT    0.030400    5.083500
FVAR       0.22744   0.18322
MOLE    1
NI1   5    0.500000    0.750000    0.625000    10.25000    0.01719    0.01719 =
         0.01401    0.00000    0.00000    0.00074
CL1   3    0.608892    0.858892    0.625000    10.50000    0.02432    0.02432 =
         0.02912    0.00441   -0.00441   -0.00540
N1    4    0.567905    0.683710    0.536240    11.00000    0.02197    0.02132 =
         0.01706    0.00066    0.00213    0.00253
C2    1    0.574050    0.598895    0.538020    11.00000    0.02690    0.02165 =
         0.02210    0.00020    0.00070    0.00110
AFIX  43
H2    2    0.547050    0.569264    0.579972    11.00000   -1.20000
AFIX   0
C3    1    0.617676    0.552765    0.481866    11.00000    0.03419    0.02727 =
         0.02918   -0.00576   -0.00165    0.00816
AFIX  43
H3    2    0.621054    0.492877    0.485600    11.00000   -1.20000
AFIX   0
C4    1    0.656324    0.595171    0.420171    11.00000    0.03763    0.04462 =
         0.02722   -0.00562    0.00775    0.01610
AFIX  43
H4    2    0.686438    0.565008    0.380471    11.00000   -1.20000
AFIX   0
C5    1    0.650358    0.682107    0.417314    11.00000    0.03710    0.04572 =
         0.02615    0.00763    0.01327    0.00870
AFIX  43
H5    2    0.676083    0.712859    0.375368    11.00000   -1.20000
AFIX   0
C6    1    0.606244    0.724141    0.476567    11.00000    0.03064    0.02795 =
         0.02327    0.00524    0.00534    0.00366
AFIX  43
H6    2    0.603152    0.784142    0.474657    11.00000   -1.20000
AFIX   0
MOLE    2
O1    6    0.649853    0.500000    0.250000    20.50000    0.03686    0.03585 =
         0.04374    0.01536    0.00000    0.00000
AFIX   2
H1    2    0.623088    0.539375    0.214625    21.00000    0.05000
AFIX   0
HKLF    4

REM  import_a.res in I4(1)/acd
REM R1 =  0.0256 for    1099 Fo > 4sig(Fo)  and  0.0286 for all    1212 data
REM     72 parameters refined using      0 restraints

END

WGHT      0.0304      5.0831

REM Highest difference peak  0.268,  deepest hole -0.421,  1-sigma level  0.055
Q1    1   0.6656  0.6409  0.4266  11.00000  0.05    0.27
Q2    1   0.5327  0.7036  0.5669  11.00000  0.05    0.24
Q3    1   0.5789  0.6411  0.5369  11.00000  0.05    0.24
Q4    1   0.5579  0.8079  0.6250  10.50000  0.05    0.23
Q5    1   0.5852  0.5802  0.4985  11.00000  0.05    0.21
Q6    1   0.6513  0.5789  0.4642  11.00000  0.05    0.20
Q7    1   0.5000  0.7500  0.5478  10.50000  0.05    0.20
Q8    1   0.6739  0.7037  0.4480  11.00000  0.05    0.18
Q9    1   0.6282  0.6982  0.4450  11.00000  0.05    0.18
Q10   1   0.5833  0.6969  0.4996  11.00000  0.05    0.17
Q11   1   0.6392  0.7513  0.4985  11.00000  0.05    0.16
Q12   1   0.5389  0.6880  0.6277  11.00000  0.05    0.15
Q13   1   0.6460  0.8483  0.5695  11.00000  0.05    0.15
Q14   1   0.6561  0.8483  0.5866  11.00000  0.05    0.15
Q15   1   0.4985  0.7112  0.5116  11.00000  0.05    0.14
Q16   1   0.6206  0.8037  0.5042  11.00000  0.05    0.14
Q17   1   0.6611  0.9111  0.6250  10.50000  0.05    0.13
Q18   1   0.6223  0.6178  0.4018  11.00000  0.05    0.12
Q19   1   0.5588  0.7474  0.5727  11.00000  0.05    0.12
Q20   1   0.4862  0.6442  0.5425  11.00000  0.05    0.12
;

_shelx_res_checksum              78177                                                                                                                                                                                                                                                           

# End of res file ...............................................................

#
# .hkl SHELXL file: JC011x2.hkl
#
#----------------------------------------------------------------------------#

#----------------------------------------------------------------------------#
#                ATOMIC TYPES, COORDINATES AND THERMAL PARAMETERS            #
#----------------------------------------------------------------------------#
 
loop_
    _atom_type_symbol
    _atom_type_description
    _atom_type_scat_dispersion_real
    _atom_type_scat_dispersion_imag
    _atom_type_scat_source
C   C    0.0033  0.0016   'International Tables Vol C Tables 4.2.6.8 and 6.1.1.4'
H   H    0.0000  0.0000   'International Tables Vol C Tables 4.2.6.8 and 6.1.1.4'
Cl  Cl   0.1484  0.1585   'International Tables Vol C Tables 4.2.6.8 and 6.1.1.4'
N   N    0.0061  0.0033   'International Tables Vol C Tables 4.2.6.8 and 6.1.1.4'
Ni  Ni   0.3393  1.1124   'International Tables Vol C Tables 4.2.6.8 and 6.1.1.4'
O   O    0.0106  0.0060   'International Tables Vol C Tables 4.2.6.8 and 6.1.1.4'

loop_
    _atom_site_label
    _atom_site_type_symbol
    _atom_site_fract_x
    _atom_site_fract_y
    _atom_site_fract_z
    _atom_site_U_iso_or_equiv
    _atom_site_adp_type
    _atom_site_occupancy
    _atom_site_site_symmetry_order
    _atom_site_calc_flag
    _atom_site_refinement_flags_posn
    _atom_site_refinement_flags_adp
    _atom_site_refinement_flags_occupancy
    _atom_site_disorder_assembly
    _atom_site_disorder_group
Ni1  Ni  0.5000       0.7500       0.6250       0.01613(12) Uani 1  4 d    S  T P  . . 
Cl1  Cl  0.60889(2)   0.85889(2)   0.6250       0.02592(14) Uani 1  2 d    S  T P  . . 
N1   N   0.56791(7)   0.68371(7)   0.53624(7)   0.0201(2)   Uani 1  1 d    .  . .  . . 
C2   C   0.57405(9)   0.59889(9)   0.53802(8)   0.0236(3)   Uani 1  1 d    .  . .  . . 
H2   H   0.5470       0.5693       0.5800       0.028       Uiso 1  1 calc R  U .  . . 
C3   C   0.61768(10)  0.55277(10)  0.48187(9)   0.0302(3)   Uani 1  1 d    .  . .  . . 
H3   H   0.6211       0.4929       0.4856       0.036       Uiso 1  1 calc R  U .  . . 
C4   C   0.65632(11)  0.59517(11)  0.42017(10)  0.0365(4)   Uani 1  1 d    .  . .  . . 
H4   H   0.6864       0.5650       0.3805       0.044       Uiso 1  1 calc R  U .  . . 
C5   C   0.65036(11)  0.68211(12)  0.41731(10)  0.0363(4)   Uani 1  1 d    .  . .  . . 
H5   H   0.6761       0.7129       0.3754       0.044       Uiso 1  1 calc R  U .  . . 
C6   C   0.60624(9)   0.72414(10)  0.47657(9)   0.0273(3)   Uani 1  1 d    .  . .  . . 
H6   H   0.6032       0.7841       0.4747       0.033       Uiso 1  1 calc R  U .  . . 
O1   O   0.6499(6)    0.5000       0.2500       0.039(4)    Uani 0.183(8)   2 d    S  T P   . . 
H1   H   0.623(8)     0.539(8)     0.215(8)     0.050       Uiso 0.1832     1 d    .  . P   . . 

loop_
    _atom_site_aniso_label
    _atom_site_aniso_U_11
    _atom_site_aniso_U_22
    _atom_site_aniso_U_33
    _atom_site_aniso_U_23
    _atom_site_aniso_U_13
    _atom_site_aniso_U_12
Ni1  0.01719(14)  0.01719(14)  0.01401(19)  0.000        0.000        0.00074(11) 
Cl1  0.02432(17)  0.02432(17)  0.0291(3)    0.00441(13) -0.00441(13) -0.00540(17) 
N1   0.0220(5)    0.0213(5)    0.0171(6)    0.0007(4)    0.0021(4)    0.0025(4)   
C2   0.0269(7)    0.0217(6)    0.0221(6)    0.0002(5)    0.0007(5)    0.0011(5)   
C3   0.0342(8)    0.0273(7)    0.0292(8)   -0.0058(6)   -0.0016(6)    0.0082(6)   
C4   0.0376(9)    0.0446(9)    0.0272(8)   -0.0056(7)    0.0077(6)    0.0161(7)   
C5   0.0371(8)    0.0457(9)    0.0261(8)    0.0076(7)    0.0133(7)    0.0087(7)   
C6   0.0306(7)    0.0279(7)    0.0233(7)    0.0052(6)    0.0053(6)    0.0037(6)   
O1   0.037(5)     0.036(5)     0.044(6)     0.015(4)     0.000        0.000       


#----------------------------------------------------------------------------#
#                               MOLECULAR GEOMETRY                           #
#----------------------------------------------------------------------------#
 
_geom_special_details
;
 All esds (except the esd in the dihedral angle between two l.s. planes)
 are estimated using the full covariance matrix.  The cell esds are taken
 into account individually in the estimation of esds in distances, angles
 and torsion angles; correlations between esds in cell parameters are only
 used when they are defined by crystal symmetry.  An approximate (isotropic)
 treatment of cell esds is used for estimating esds involving l.s. planes.
;
loop_
    _geom_bond_atom_site_label_1
    _geom_bond_atom_site_label_2
    _geom_bond_distance
    _geom_bond_site_symmetry_2
    _geom_bond_publ_flag
Ni1  N1   2.1195(12)  8_666       ?           
Ni1  N1   2.1195(12)  15_445      ?           
Ni1  N1   2.1195(12)  10_564      ?           
Ni1  N1   2.1195(12)  .           ?           
Ni1  Cl1  2.4336(5)   .           ?           
Ni1  Cl1  2.4336(5)   10_564      ?           
N1   C6   1.3377(18)  .           ?           
N1   C2   1.3442(17)  .           ?           
C2   C3   1.380(2)    .           ?           
C2   H2   0.9500      .           ?           
C3   C4   1.381(2)    .           ?           
C3   H3   0.9500      .           ?           
C4   C5   1.378(2)    .           ?           
C4   H4   0.9500      .           ?           
C5   C6   1.388(2)    .           ?           
C5   H5   0.9500      .           ?           
C6   H6   0.9500      .           ?           
O1   H1   0.96(15)    .           ?           

loop_
    _geom_angle_atom_site_label_1
    _geom_angle_atom_site_label_2
    _geom_angle_atom_site_label_3
    _geom_angle
    _geom_angle_site_symmetry_1
    _geom_angle_site_symmetry_3
    _geom_angle_publ_flag
N1   Ni1  N1    90.07(6)    8_666   15_445  ?       
N1   Ni1  N1   179.03(6)    8_666   10_564  ?       
N1   Ni1  N1    89.94(6)    15_445  10_564  ?       
N1   Ni1  N1    89.94(6)    8_666   .       ?       
N1   Ni1  N1   179.03(6)    15_445  .       ?       
N1   Ni1  N1    90.07(6)    10_564  .       ?       
N1   Ni1  Cl1   90.49(3)    8_666   .       ?       
N1   Ni1  Cl1   89.51(3)    15_445  .       ?       
N1   Ni1  Cl1   90.49(3)    10_564  .       ?       
N1   Ni1  Cl1   89.51(3)    .       .       ?       
N1   Ni1  Cl1   89.51(3)    8_666   10_564  ?       
N1   Ni1  Cl1   90.49(3)    15_445  10_564  ?       
N1   Ni1  Cl1   89.51(3)    10_564  10_564  ?       
N1   Ni1  Cl1   90.49(3)    .       10_564  ?       
Cl1  Ni1  Cl1  180.0        .       10_564  ?       
C6   N1   C2   117.41(12)   .       .       ?       
C6   N1   Ni1  121.68(10)   .       .       ?       
C2   N1   Ni1  120.90(9)    .       .       ?       
N1   C2   C3   123.19(14)   .       .       ?       
N1   C2   H2   118.4        .       .       ?       
C3   C2   H2   118.4        .       .       ?       
C2   C3   C4   118.84(14)   .       .       ?       
C2   C3   H3   120.6        .       .       ?       
C4   C3   H3   120.6        .       .       ?       
C5   C4   C3   118.69(15)   .       .       ?       
C5   C4   H4   120.7        .       .       ?       
C3   C4   H4   120.7        .       .       ?       
C4   C5   C6   119.10(15)   .       .       ?       
C4   C5   H5   120.5        .       .       ?       
C6   C5   H5   120.5        .       .       ?       
N1   C6   C5   122.76(15)   .       .       ?       
N1   C6   H6   118.6        .       .       ?       
C5   C6   H6   118.6        .       .       ?       

loop_
    _geom_torsion_atom_site_label_1
    _geom_torsion_atom_site_label_2
    _geom_torsion_atom_site_label_3
    _geom_torsion_atom_site_label_4
    _geom_torsion
    _geom_torsion_site_symmetry_1
    _geom_torsion_site_symmetry_2
    _geom_torsion_site_symmetry_3
    _geom_torsion_site_symmetry_4
    _geom_torsion_publ_flag
C6   N1   C2   C3      0.1(2)     .       .       .       .       ?       
Ni1  N1   C2   C3   -179.80(11)   .       .       .       .       ?       
N1   C2   C3   C4     -0.7(2)     .       .       .       .       ?       
C2   C3   C4   C5      0.4(2)     .       .       .       .       ?       
C3   C4   C5   C6      0.3(3)     .       .       .       .       ?       
C2   N1   C6   C5      0.7(2)     .       .       .       .       ?       
Ni1  N1   C6   C5   -179.34(12)   .       .       .       .       ?       
C4   C5   C6   N1     -1.0(3)     .       .       .       .       ?       

#----------------------------------------------------------------------------#
#===END OF CIF FILE FOR JC011X2                                              #
#----------------------------------------------------------------------------#
